# Supplementary material for: Cytogenetic, Morphometric, and Ecological Characterization of Festuca indigesta Boiss. in the Southeast of Spain
Source: MDPI journal article supplement (doi:10.3390/plants11050693), 2022-03-04
Supplement: s1 [file s1]

**Table S2.** Eigenvectors showing correlations of morphological characters with the first two principal components.

| Character                       | PC1   | PC2    |
|---------------------------------|-------|--------|
| Panicle length                  | 0.274 | -0.270 |
| Spikelet length                 | 0.376 | -0.196 |
| Lower glume length              | 0.346 | -0.246 |
| Upper glume length              | 0.402 | -0.198 |
| Lemma length                    | 0.424 | -0.125 |
| Anther length                   | 0.318 | -0.131 |
| Stomatal accessory cells length | 0.318 | 0.654  |
| Stomatal guard cells length     | 0.347 | 0.573  |
