# Supplementary material for: Cytogenetic, Morphometric, and Ecological Characterization of Festuca indigesta Boiss. in the Southeast of Spain
Source: MDPI journal article supplement (doi:10.3390/plants11050693), 2022-03-04
Supplement: s1 [file s1]

**Table S1.** Morphometric data for cytotypes of *Festuca indigesta* subsp. *indigesta*. Different letters represent statistically significant differences at  $p < 0.05$ .

| Character                                  | Cytotype | Mean $\pm$ SD                  | Min   | Max   |
|--------------------------------------------|----------|--------------------------------|-------|-------|
| Culm length (cm)                           | 12x      | 33.67 $\pm$ 11.17 <sup>a</sup> | 12.00 | 50.00 |
|                                            | 8x       | 40.59 $\pm$ 5.84 <sup>b</sup>  | 25.00 | 51.00 |
|                                            | 6x       | 30.91 $\pm$ 3.64 <sup>a</sup>  | 23.50 | 39.50 |
| Culm diameter (mm)                         | 12x      | 0.66 $\pm$ 0.14                | 0.50  | 1.00  |
|                                            | 8x       | 0.66 $\pm$ 0.09                | 0.50  | 0.80  |
|                                            | 6x       | 0.57 $\pm$ 0.08                | 0.40  | 0.80  |
| Leaf diameter (mm)                         | 12x      | 0.87 $\pm$ 0.12                | 0.70  | 1.10  |
|                                            | 8x       | 0.91 $\pm$ 0.12                | 0.70  | 1.30  |
|                                            | 6x       | 0.90 $\pm$ 0.10                | 0.70  | 1.10  |
| Auricle length (mm)                        | 12x      | 0.32 $\pm$ 0.12 <sup>a</sup>   | 0.10  | 0.70  |
|                                            | 8x       | 0.52 $\pm$ 0.21 <sup>b</sup>   | 0.20  | 1.00  |
|                                            | 6x       | 0.59 $\pm$ 0.32 <sup>b</sup>   | 0.10  | 1.40  |
| Panicle length (cm)                        | 12x      | 5.87 $\pm$ 1.98 <sup>ab</sup>  | 3.00  | 10.00 |
|                                            | 8x       | 6.18 $\pm$ 1.27 <sup>b</sup>   | 4.00  | 9.20  |
|                                            | 6x       | 4.90 $\pm$ 0.98 <sup>a</sup>   | 3.00  | 8.50  |
| Spikelet length (mm)                       | 12x      | 10.15 $\pm$ 1.22 <sup>c</sup>  | 8.20  | 15.00 |
|                                            | 8x       | 9.52 $\pm$ 1.14 <sup>b</sup>   | 7.30  | 12.50 |
|                                            | 6x       | 8.39 $\pm$ 0.64 <sup>a</sup>   | 7.20  | 10.00 |
| Lower glume length (mm)                    | 12x      | 3.77 $\pm$ 0.53 <sup>c</sup>   | 3.00  | 5.70  |
|                                            | 8x       | 3.38 $\pm$ 0.41 <sup>b</sup>   | 2.60  | 4.40  |
|                                            | 6x       | 3.07 $\pm$ 0.38 <sup>a</sup>   | 2.50  | 4.20  |
| Upper glume length (mm)                    | 12x      | 5.31 $\pm$ 0.63 <sup>c</sup>   | 4.10  | 7.00  |
|                                            | 8x       | 4.89 $\pm$ 0.55 <sup>b</sup>   | 3.80  | 6.70  |
|                                            | 6x       | 4.23 $\pm$ 0.37 <sup>a</sup>   | 3.50  | 5.40  |
| Lemma length (mm)                          | 12x      | 6.41 $\pm$ 0.54 <sup>c</sup>   | 5.40  | 7.60  |
|                                            | 8x       | 5.84 $\pm$ 0.43 <sup>b</sup>   | 4.80  | 6.70  |
|                                            | 6x       | 5.12 $\pm$ 0.33 <sup>a</sup>   | 4.50  | 6.00  |
| Awn length (mm)                            | 12x      | 1.45 $\pm$ 0.54                | 0.60  | 2.70  |
|                                            | 8x       | 1.30 $\pm$ 0.35                | 0.70  | 2.00  |
|                                            | 6x       | 1.32 $\pm$ 0.38                | 0.70  | 2.50  |
| Number of flowers per spikelet             | 12x      | 5.47 $\pm$ 1.18 <sup>ab</sup>  | 3.30  | 8.00  |
|                                            | 8x       | 5.94 $\pm$ 1.27 <sup>b</sup>   | 4.00  | 9.00  |
|                                            | 6x       | 5.08 $\pm$ 0.74 <sup>a</sup>   | 4.00  | 7.00  |
| Anther length (mm)                         | 12x      | 3.42 $\pm$ 0.70 <sup>c</sup>   | 2.40  | 4.90  |
|                                            | 8x       | 2.52 $\pm$ 0.42 <sup>b</sup>   | 2.00  | 3.40  |
|                                            | 6x       | 2.81 $\pm$ 0.37 <sup>a</sup>   | 2.00  | 3.70  |
| Stomatal accessory cells ( $\mu$ m)        | 12x      | 30.76 $\pm$ 4.84 <sup>c</sup>  | 17.39 | 41.53 |
|                                            | 8x       | 25.83 $\pm$ 3.17 <sup>b</sup>  | 17.94 | 34.27 |
|                                            | 6x       | 22.84 $\pm$ 3.34 <sup>a</sup>  | 15.79 | 35.56 |
| Stomatal guard cells of stomata ( $\mu$ m) | 12x      | 38.84 $\pm$ 5.93 <sup>c</sup>  | 22.93 | 58.04 |
|                                            | 8x       | 33.92 $\pm$ 3.80 <sup>b</sup>  | 25.34 | 43.35 |
|                                            | 6x       | 30.12 $\pm$ 3.49 <sup>a</sup>  | 22.67 | 39.37 |
